# Supplementary material
Source: HighWire-hosted journal article supplement (https://adc.bmj.com/content/archdischild-2020-320834)
Supplement: inline-supplementary-material-6 [file inline-supplementary-material-6.pdf]

## Supplementary material 5

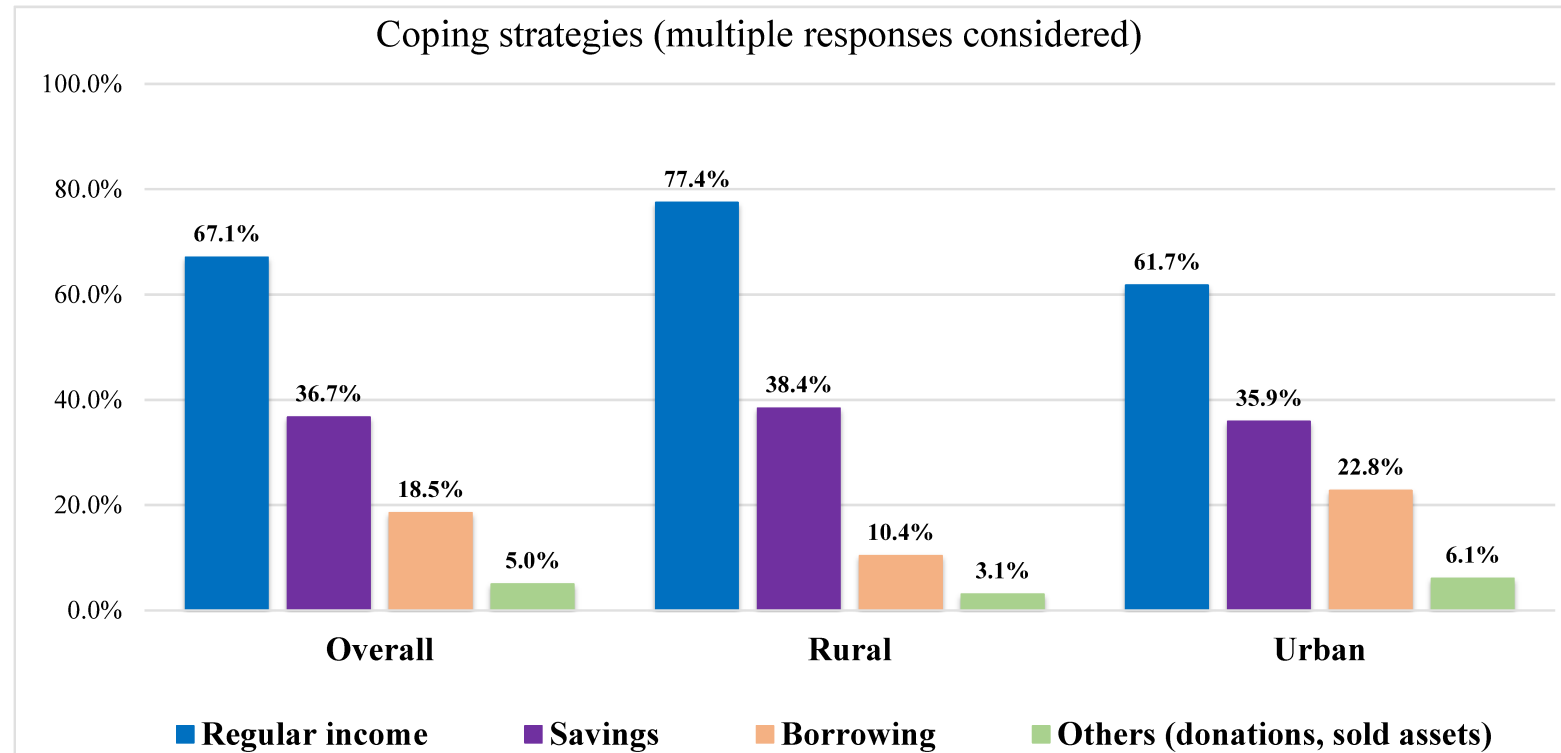

**Fig. S3.** Household strategies to cope expenses for severe childhood pneumonia treatment
